# Supplementary material
Source: HighWire-hosted journal article supplement (https://erj.ersjournals.com/content/49/5/1602383)
Supplement: inline-supplementary-material-1 [file inline-supplementary-material-1.pdf]

## Differences between Asthma-COPD overlap syndrome (ACOS) and adult-onset asthma

### Supplementary tables

**Table S1. The inclusion and exclusion criteria of SAAS study [e1]**

|                    |                                                                                                                                                                                                                                                                                                                                                                                                                                                                                                                                                                                                                                                                                                                                                                                                                 |
|--------------------|-----------------------------------------------------------------------------------------------------------------------------------------------------------------------------------------------------------------------------------------------------------------------------------------------------------------------------------------------------------------------------------------------------------------------------------------------------------------------------------------------------------------------------------------------------------------------------------------------------------------------------------------------------------------------------------------------------------------------------------------------------------------------------------------------------------------|
| Inclusion criteria | <ul style="list-style-type: none"><li>• a diagnosis of new-onset asthma made by a respiratory specialist</li><li>• diagnosis confirmed by at least one of the following objective lung function measurements<sup>u</sup>:<ul style="list-style-type: none"><li>○ FEV<sub>1</sub> reversibility in spirometry of at least 15 % and 200 mL</li><li>○ diurnal variability (≥ 20 %) or repeated reversibility (≥ 15 % / 60 L / min) in PEF-follow-up</li><li>○ a significant decrease in FEV<sub>1</sub> (15 %) or PEF (20 %) in response to exercise or allergen</li><li>○ a significant reversibility in FEV<sub>1</sub> (at least 15 % and 200 ml) or significant mean PEF in response to a trial with oral or inhaled glucocorticoids</li></ul></li><li>• symptoms of asthma</li><li>• age ≥ 15 years</li></ul> |
| Exclusion criteria | <ul style="list-style-type: none"><li>• physical or mental inability to provide signed informed consent</li><li>• diagnosis of asthma below the age of 15 years</li><li>• of note:<ul style="list-style-type: none"><li>○ patients with comorbidities, either other lung disease or any other significant disease were not excluded</li><li>○ patients were not excluded because of smoking, alcohol use or any other lifestyle factor</li><li>○ respiratory symptoms or any other disease during childhood was not a reason to exclude patients, but a diagnosis of asthma at age &lt;15 years was an exclusion criteria</li></ul></li></ul>                                                                                                                                                                   |

<sup>u</sup>The objective lung function criteria reflect those of national and international guidelines valid in 1999-2002 and may not exactly follow those valid at the moment [e2, e3].

Table S2. Characteristics of the included and excluded patients

|                                               | Included patients<br>n=188 | Excluded patients<br>n=15 | p-value             |
|-----------------------------------------------|----------------------------|---------------------------|---------------------|
| Age years                                     | 58.7 ±13.5                 | 51.7 ±13.7                | 0.053               |
| BMI kg·m <sup>-2</sup>                        | 28 (24-31)                 | 27 (25-32)                | 0.934               |
| Gender male n(%)                              | 79 (42.0)                  | 6 (40.0)                  | > 0.999             |
| Asthma control<br>according to GINA<br>n(%)   |                            |                           | 0.940               |
| Controlled                                    | 64 (34.0)                  | 5 (33.3)                  |                     |
| Partly<br>controlled                          | 69 (36.7)                  | 5 (33.3)                  |                     |
| Uncontrolled                                  | 55 (29.3)                  | 5 (33.3)                  |                     |
| LABA in daily use<br>n(%)                     | 93 (49.5)                  | 3 (20.0)                  | <b>0.032*</b>       |
| ≥2 oral steroid<br>courses in 2 years<br>n(%) | 24 (13.0)                  | 3 (20.0)                  | 0.433               |
| ICS daily use n(%)                            | 149 (79.3)                 | 6 (40.0)                  | <b>0.002**</b>      |
| ICS dose/day<br>bud eq <sup>§</sup>           | 800 (400-1000)             | 1000 (520-1550)           | 0.438               |
| ACT score                                     | 22 (19-24)                 | 22 (18-24)                | 0.586               |
| CAT score                                     | 11 (6-17)                  | 10 (5-17)                 | 0.754               |
| AQ20 score                                    | 4 (1-7)                    | 4 (2-7)                   | 0.797               |
| DLco % predicted                              | 94 ±18                     | 87 ±16                    | 0.171               |
| DLco/VA %<br>predicted                        | 95 ± 16                    | 93 ± 15                   | 0.536               |
| B-Neutrophils<br>x10 <sup>9</sup> /L          | 3.70 (2.90-4.78)           | 3.80 (3.50-5.10)          | 0.562               |
| B-Eosinophils<br>x10 <sup>9</sup> /L          | 0.16 (0.10-0.27)           | 0.26 (0.11-0.28)          | 0.269               |
| IgE kU/l                                      | 61 (24-169)                | 54 (26-93)                | 0.684               |
| FeNO ppb                                      | 11 (5-18)                  | 11 (5-30)                 | 0.551               |
| Smoking status n(%)                           |                            |                           | <b>&lt;0.001***</b> |
| Never smoker                                  | 96 (51.1)                  | 0 (0)                     |                     |
| Ex-smoker                                     | 68 (36.2)                  | 9 (60.0)                  |                     |
| Current smoker                                | 24 (12.8)                  | 6 (40.0)                  |                     |
| FEV <sub>1</sub> % predicted <sup>δ</sup>     | 90 (80-98)                 | 92 (84-102)               | 0.732               |
| FEV <sub>1</sub> /FVC <sup>δ</sup>            | 0.75 (0.68-0.81)           | 0.78 (0.74-0.81)          | 0.319               |
| FVC % predicted <sup>δ</sup>                  | 98 (88-108)                | 97 (89-103)               | 0.620               |

Data is shown as n (%), mean ± SD, or median (interquartile range).<sup>§</sup>: budesonide equivalent, of daily users  
<sup>δ</sup>: post bronchodilator, BMI= Body mass index, GINA= Global Initiative for Asthma, ICS= inhaled corticosteroids, LABA= long acting beta agonists, ACT= Asthma Control Test score, CAT= COPD Assessment Test, AQ20= Asthma Questionnaire 20, DLco = Diffusing capacity of the lung for carbon monoxide, VA= Alveolar volume, B= blood, IgE= Immunoglobulin E, FeNO= Exhaled nitric oxide.

**Table S3. Pre bronchodilator lung function**

|                              | Never and ex-smokers with <10 pack-years<br>n=122 | Non-obstructive patients with ≥10 pack-years<br>n=32 | ACOS ≥10 pack-years FEV <sub>1</sub> /FVC<0.7<br>n=34 | p-value <sup>Φ</sup> |
|------------------------------|---------------------------------------------------|------------------------------------------------------|-------------------------------------------------------|----------------------|
| FEV <sub>1</sub> L           | 2.68 (2.24-3.17)                                  | 2.98 (2.26-3.47)                                     | 2.16 (1.63-2.80)##                                    | <0.001***            |
| FEV <sub>1</sub> % predicted | 90.0 (82.8-99.0)                                  | 86.0 (75.5-92.8)                                     | 72.5 (55.0-83.5) ##                                   | <0.001***            |
| FEV <sub>1</sub> /FVC        | 0.75 (0.69-0.79)                                  | 0.75 (0.73-0.80)                                     | 0.61 (0.51-0.65) ##                                   | <0.001***            |
| FVC L                        | 3.65 (3.07-4.31)                                  | 3.87 (3.04-4.78)                                     | 3.63 (3.23-4.40)                                      | 0.822                |
| FVC % predicted              | 98.0 (89.8-110.0)                                 | 93.0 (79.5-101.0) †                                  | 94.0 (87.8-105.3)                                     | 0.026*               |

Data is shown as median (interquartile range)

Φ: p-value across all groups

†: as compared to group 1. (Never and ex-smokers with <10 pack-years) p<0.05

#: as compared to group 2. (Non-obstructive patients with ≥10 pack-years) p<0.05

**Table S4. Characteristics of the groups of ACOS and obstructive asthma**

|                                         | Obstructive asthma <10 pack-years and FEV <sub>1</sub> /FVC<0.7<br>n=19 | ACOS ≥10 pack-years FEV <sub>1</sub> /FVC<0.7<br>n=34 | p-value |
|-----------------------------------------|-------------------------------------------------------------------------|-------------------------------------------------------|---------|
| Age years                               | 62.3 ± 11.7                                                             | 65.0 ± 10.7                                           | 0.391   |
| Gender male n(%)                        | 8 (42.1)                                                                | 24 (70.6)                                             | 0.077   |
| BMI kg·m <sup>-2</sup>                  | 27.6 (24.6-30.9)                                                        | 28.1 (24.2-30.7)                                      | 0.904   |
| Asthma control according to GINA n(%)   |                                                                         |                                                       | 0.115   |
| controlled                              | 5 (26.3)                                                                | 5 (14.7)                                              |         |
| partly controlled                       | 9 (47.4)                                                                | 10 (29.4)                                             |         |
| uncontrolled                            | 5 (26.3)                                                                | 19 (55.9)                                             |         |
| ACT                                     | 22 (21-24)                                                              | 21 (16-23)                                            | 0.125   |
| CAT                                     | 12 ± 7                                                                  | 16 ± 7                                                | 0.049*  |
| AQ20                                    | 4 (1-8)                                                                 | 4 (2-8)                                               | 0.787   |
| ICS daily use n(%)                      | 17 (89.5)                                                               | 27 (79.4)                                             | 0.463   |
| ICS dose/day bud eq <sup>§</sup>        | 800 (713-1000)                                                          | 800 (800-1200)                                        | 0.567   |
| ≥2 oral steroid courses in 2 years n(%) | 3 (16.7)                                                                | 4 (12.1)                                              | 0.686   |

|                                              |           |           |        |
|----------------------------------------------|-----------|-----------|--------|
| LABA in daily use n(%)                       | 13 (68.4) | 21 (61.8) | 0.768  |
| LAMA, LTRA or theophylline in daily use n(%) | 7 (36.8)  | 8 (23.5)  | 0.351  |
| Use of oral steroid courses ever n(%)        | 8 (44.4)  | 7 (21.2)  | 0.112  |
| Skin-prick positive <sup>μ</sup> n(%)        | 4 (21.1)  | 5 (20.0)  | >0.999 |
| Continuous rhinitis n(%)                     | 8 (42.1)  | 8 (23.5)  | 0.215  |
| Allergic conjunctivitis or rhinitis n(%)     | 11 (57.9) | 15 (45.5) | 0.565  |

Data is shown as n (%), mean  $\pm$  SD, or median (interquartile range). <sup>§</sup>: budesonide equivalent, of daily users, <sup>μ</sup>: at the moment of diagnosis (1999-2002) [e1], GINA= Global Initiative for Asthma, ACT= Asthma Control Test, CAT= COPD Assessment Test, AQ20= Asthma Questionnaire 20, ICS= inhaled corticosteroids, LABA= long acting beta agonists, LAMA= long acting muscarinic antagonists, LTRA= leukotriene antagonists

**Table S5. Lung function in groups of ACOS and obstructive asthma**

|                                                  | Obstructive asthma<br><10 pack-years<br>and<br>FEV <sub>1</sub> /FVC<0.7<br>n=19 | ACOS<br>≥10 pack-years<br>FEV <sub>1</sub> /FVC<0.7<br>n=34 | <i>p</i> -value |
|--------------------------------------------------|----------------------------------------------------------------------------------|-------------------------------------------------------------|-----------------|
| <b>Post bronchodilator</b>                       |                                                                                  |                                                             |                 |
| FEV <sub>1</sub> L                               | 2.42 (1.97-3.24)                                                                 | 2.32 (1.80-2.98)                                            | 0.528           |
| FEV <sub>1</sub> % predicted                     | 84.0 (78.0-94.0)                                                                 | 75.0 (57.5-85.5)                                            | 0.103           |
| FEV <sub>1</sub> /FVC                            | 0.64 (0.62-0.68)                                                                 | 0.62 (0.54-0.67)                                            | 0.334           |
| FVC L                                            | 3.93 (3.11-5.04)                                                                 | 3.92 (3.41-4.47)                                            | 0.867           |
| FVC % predicted                                  | 103.0 (95.0-116.0)                                                               | 98.5 (91.0-106.5)                                           | 0.334           |
| <b>FEV<sub>1</sub> reversibility<sup>Ω</sup></b> |                                                                                  |                                                             |                 |
| mL                                               | 155.8 $\pm$ 122.3                                                                | 135.6 $\pm$ 149.9                                           | 0.619           |
| %                                                | 7.2 $\pm$ 5.0                                                                    | 6.7 $\pm$ 7.7                                               | 0.779           |
| <b>FVC reversibility<sup>Ω</sup></b>             |                                                                                  |                                                             |                 |
| mL                                               | 133.2 $\pm$ 128.1                                                                | 151.2 $\pm$ 239.7                                           | 0.723           |
| %                                                | 3.6 $\pm$ 3.4                                                                    | 4.3 $\pm$ 6.6                                               | 0.618           |

Data is shown as mean  $\pm$  SD, or median (interquartile range), <sup>Ω</sup>: change from pre- to postbronchodilator

**Table S6. Comorbidities in the groups of ACOS and obstructive asthma**

|                                                | <b>Obstructive asthma<br/>&lt;10 pack-years and<br/>FEV<sub>1</sub>/FVC&lt;0.7<br/>n=19</b> | <b>ACOS<br/>≥10 pack-years<br/>FEV<sub>1</sub>/FVC&lt;0.7<br/>n=34</b> | <b>p-value</b> |
|------------------------------------------------|---------------------------------------------------------------------------------------------|------------------------------------------------------------------------|----------------|
| <b>Number of comorbidities</b>                 | 1 (0-1)                                                                                     | 2 (1-3)                                                                | <b>0.030*</b>  |
| <b>Obesity<sup>§</sup></b>                     | 5 (26.3)                                                                                    | 10 (29.4)                                                              | >0.999         |
| <b>Hypertension</b>                            | 7 (36.8)                                                                                    | 18 (52.9)                                                              | 0.390          |
| <b>Coronary heart disease</b>                  | 3 (15.8)                                                                                    | 7 (20.6)                                                               | >0.999         |
| <b>Hypercholesterolemia</b>                    | 3 (15.8)                                                                                    | 12 (35.3)                                                              | 0.205          |
| <b>Diabetes</b>                                | 3 (15.8)                                                                                    | 8 (23.5)                                                               | 0.726          |
| <b>Systemic rheumatoid disease</b>             | 0                                                                                           | 1 (2.9)                                                                | >0.999         |
| <b>Thyroidal disease</b>                       | 0                                                                                           | 4 (11.8)                                                               | 0.284          |
| <b>Depression</b>                              | 1 (5.3)                                                                                     | 3 (8.8)                                                                | >0.999         |
| <b>Painful condition</b>                       | 3 (15.8)                                                                                    | 4 (11.8)                                                               | 0.691          |
| <b>Treated dyspepsia</b>                       | 1 (5.3)                                                                                     | 3 (8.8)                                                                | >0.999         |
| <b>Number of other medications<sup>Ω</sup></b> | 2 (0-3)                                                                                     | 3 (1-7)                                                                | 0.100          |

Data is shown as n (%), or median (interquartile range), <sup>§</sup>: BMI ≥30, <sup>Ω</sup>: Other than medications for asthma or allergy

E-table references:

e1. Kankaanranta H, Ilmarinen P, Kankaanranta T, Tuomisto LE. Seinäjoki adult asthma study (SAAS): a protocol for a 12-year real-life follow-up study of new-onset asthma diagnosed at adult age and treated in primary and specialised care. NPJ Prim Care Respir Med 2015;25:15042

e2. Haahtela T, Lehtimäki L, Ahonen E, Harju T, Jartti T, Kankaanranta H et al. Update on current guidelines: asthma. Duodecim 2013; 129: 994–995.

e3. Global Initiative for Asthma: Global Strategy for Asthma Management and Prevention. Updated 2016. <http://www.ginasthma.org/>. Date last accessed: November 15<sup>th</sup> 2016.
